# Supplementary material for: Disruptive Behavior Disorders and Psychopathic Traits in Adolescents: Empathy-Related Responses to Witnessing Animal Distress
Source: Springer Nature journal article supplement (doi:10.1007/s10862-021-09891-2), 2021-06-02
Supplement: MOESM1 [file 19224184]

Table 2S

Descriptive characteristics of boys with disruptive behavior disorder (DBD) and low (-) vs high (+) levels of Narcissism (NAR), Callous Unemotional traits (CU) and Impulsivity (IMP)

|  | **DBD/NAR-**  **(*n* = 13)** | | **DBD/NAR+**  **(*n* = 18)** | |  | **DBD/CU-**  **(*n* = 17)** | | **DBD/CU+**  **(*n* = 14)** | |  | **DBD/IMP-**  **(*n* = 15)** | | **DBD/IMP+**  **(*n* = 16)** | |  |
| --- | --- | --- | --- | --- | --- | --- | --- | --- | --- | --- | --- | --- | --- | --- | --- |
|  | ***M*** | ***(SD)*** | ***M*** | ***(SD)*** | ***F(2,60)*** | ***M*** | ***(SD)*** | ***M*** | ***(SD)*** | ***F(2,60)*** | ***M*** | ***(SD)*** | ***M*** | ***(SD)*** | ***F(2,60)*** |
| **Age** | 13.46 | (0.97) | 13.67 | (1.03) | 0.49 | 13.29 | (0.85) | 13.93 | (1.07) | 2.39 | 13.67 | (0.90) | 13.50 | (1.10) | 0.42 |
| **IQ** | 98.00 | (12.34) | 95.67 | (7.72) | 0.75 | 79.65 | (10.34) | 95.43 | (9.34) | 0.73 | 97.47 | (12.00) | 95.88 | (7.50) | 0.63 |
| **APSD** | 23.31b | (6.04) | 31.50c | (3.38) | 84.06*** | 24.71b | (5.99) | 32.14c | (3.30) | 78.05*** | 24.73b | (6.65) | 31.19c | (3.64) | 71.38*** |
| **NAR** | 6.61b | (1.94) | 11.33c | (1.37) | 124.52*** | 8.59b | (3.14) | 10.29b | (2.23) | 60.74*** | 8.40b | (3.11) | 10.25c | (2.35) | 61.87*** |
| **CU** | 7.46b | (2.03) | 8.72b | (1.60) | 9.33*** | 6.82a | (1.18) | 9.86b | (0.95) | 17.51*** | 7.60b | (2.06) | 8.75b | (1.52) | 9.13*** |
| **IMP** | 7.23b | (2.42) | 8.72c | (1.07) | 43.89*** | 7.14b | (2.20) | 8.92c | (0.92) | 44.21*** | 6.73b | (1.87) | 9.37c | (0.50) | 60.18*** |
|  |  |  |  |  |  |  |  |  |  |  |  |  |  |  |  |
| **Child Behavior Checklist** |  |  |  |  |  |  |  |  |  |  |  |  |  |  |  |
| **Externalizing** | 70.31b | (4.48) | 72.22b | (8.17) | 77.23*** | 68.41b | (3.97) | 75.07c | (7.90) | 87.85*** | 69.80b | (5.64) | 72.94b | (7.66) | 78.78*** |
| Aggressive | 70.23b | (8.17) | 74.72b | (10.58) | 58.99*** | 68.71b | (6.28) | 77.86c | (11.04) | 74.60*** | 70.47b | (8.74) | 75.06b | (10.41) | 59.30*** |
| Rule-breaking | 68.62b | (4.75) | 68.78b | (8.75) | 69.97*** | 66.12b | (4.37) | 71.86c | (8.83) | 85.85*** | 67.33b | (5.25) | 70.00b | (8.69) | 73.04*** |
| **Internalizing** | 61.00b | (7.11) | 62.56b | (9.26) | 14.70*** | 61.76b | (7.81) | 62.07b | (9.23) | 14.54*** | 61.78b | (8.05) | 61.94b | (8.85) | 14.53*** |
| Withdrawn | 61.31b | (4.94) | 65.72b | (9.49) | 17.25*** | 61.94b | (6.40) | 66.21b | (9.51) | 17.12*** | 63.13b | (7.35) | 64.56b | (8.94) | 14.89*** |
| Somatic Complaints | 60.85b | (7.87) | 57.50 | (7.89) | 2.70 | 59.47 | (7.97) | 58.21 | (8.13) | 2.04 | 60.73 | (8.66) | 57.19 | (7.03) | 2.82 |
| Anxious/Depressed | 57.85b | (8.03) | 61.06b | (9.01) | 9.36*** | 59.82b | (9.33) | 59.57b | (8.03) | 8.31** | 58.47b | (8.37) | 60.88b | (8.96) | 8.90*** |
|  |  |  |  |  |  |  |  |  |  |  |  |  |  |  |  |
| **Teacher's Report Form** |  |  |  |  |  |  |  |  |  |  |  |  |  |  |  |
| **Externalizing** | 64.38b | (8.57) | 72.61c | (6.71) | 58.73*** | 66.82b | (9.24) | 72.00b | (6.39) | 52.20*** | 63.53b | (6.92) | 74.44c | (6.15) | 69.33*** |
| Aggressive | 64.77b | (10.99) | 74.11c | (9.08) | 41.51*** | 67.47b | (11.09) | 73.50c | (9.85) | 34.89*** | 63.27b | (7.68) | 67.69c | (9.27) | 59.15*** |
| Rule-breaking | 63.54b | (9.15) | 70.39c | (8.01) | 45.76*** | 65.24b | (9.24) | 70.29c | (7.68) | 41.51*** | 62.73b | (7.93) | 72.00c | (7.76) | 55.74*** |
| **Internalizing** | 60.00b | (6.49) | 61.11b | (7.41) | 48.64*** | 61.29b | (8.00) | 59.86b | (5.61) | 48.84*** | 58.73b | (6.16) | 62.44b | (7.36) | 51.63*** |
| Withdrawn | 57.31b | (5.39) | 60.72c | (4.54) | 35.24*** | 58.12b | (6.03) | 60.71b | (3.43) | 32.74*** | 58.53b | (4.63) | 60.00b | (5.60) | 30.48*** |
| Somatic Complaints | 56.00b | (8.72) | 57.83b | (8.63) | 9.45*** | 58.06b | (8.96) | 55.86b | (8.25) | 9.65*** | 53.87a | (7.95) | 60.06b | (8.26) | 14.69*** |
| Anxious/Depressed | 60.92b | (7.28) | 60.00b | (7.71) | 23.77*** | 62.47b | (8.11) | 57.86c | (5.80) | 29.07*** | 58.67b | (5.69) | 62.00b | (8.62) | 26.33*** |

*Note*. APSD = APSD total index; NAR = narcissism; CU = callous-unemotional; IMP = impulsivity. ANOVAs examined differences between NC and DBD subgroups. Means with different superscripts (NC included) are significantly different as revealed by *t*-tests (*p* < .05).

*** *p* < .001; ** *p* < .01
